# Supplementary material for: Small Gene Networks Delineate Immune Cell States and Characterize Immunotherapy Response in Melanoma
Source: PubMed Central journal article supplement — Cancer Immunol Res. 2023 May 25;11(8):1125–36. doi: 10.1158/2326-6066.CIR-22-0563 (PMC10398358; doi:10.1158/2326-6066.cir-22-0563), 2023-05-25
Supplement: cir-22-0563_supplementary_figures_suppsf1-sf2.pdf [file cir-22-0563_supplementary_figures_suppsf1-sf2.pdf]

# Supplementary Figure 1

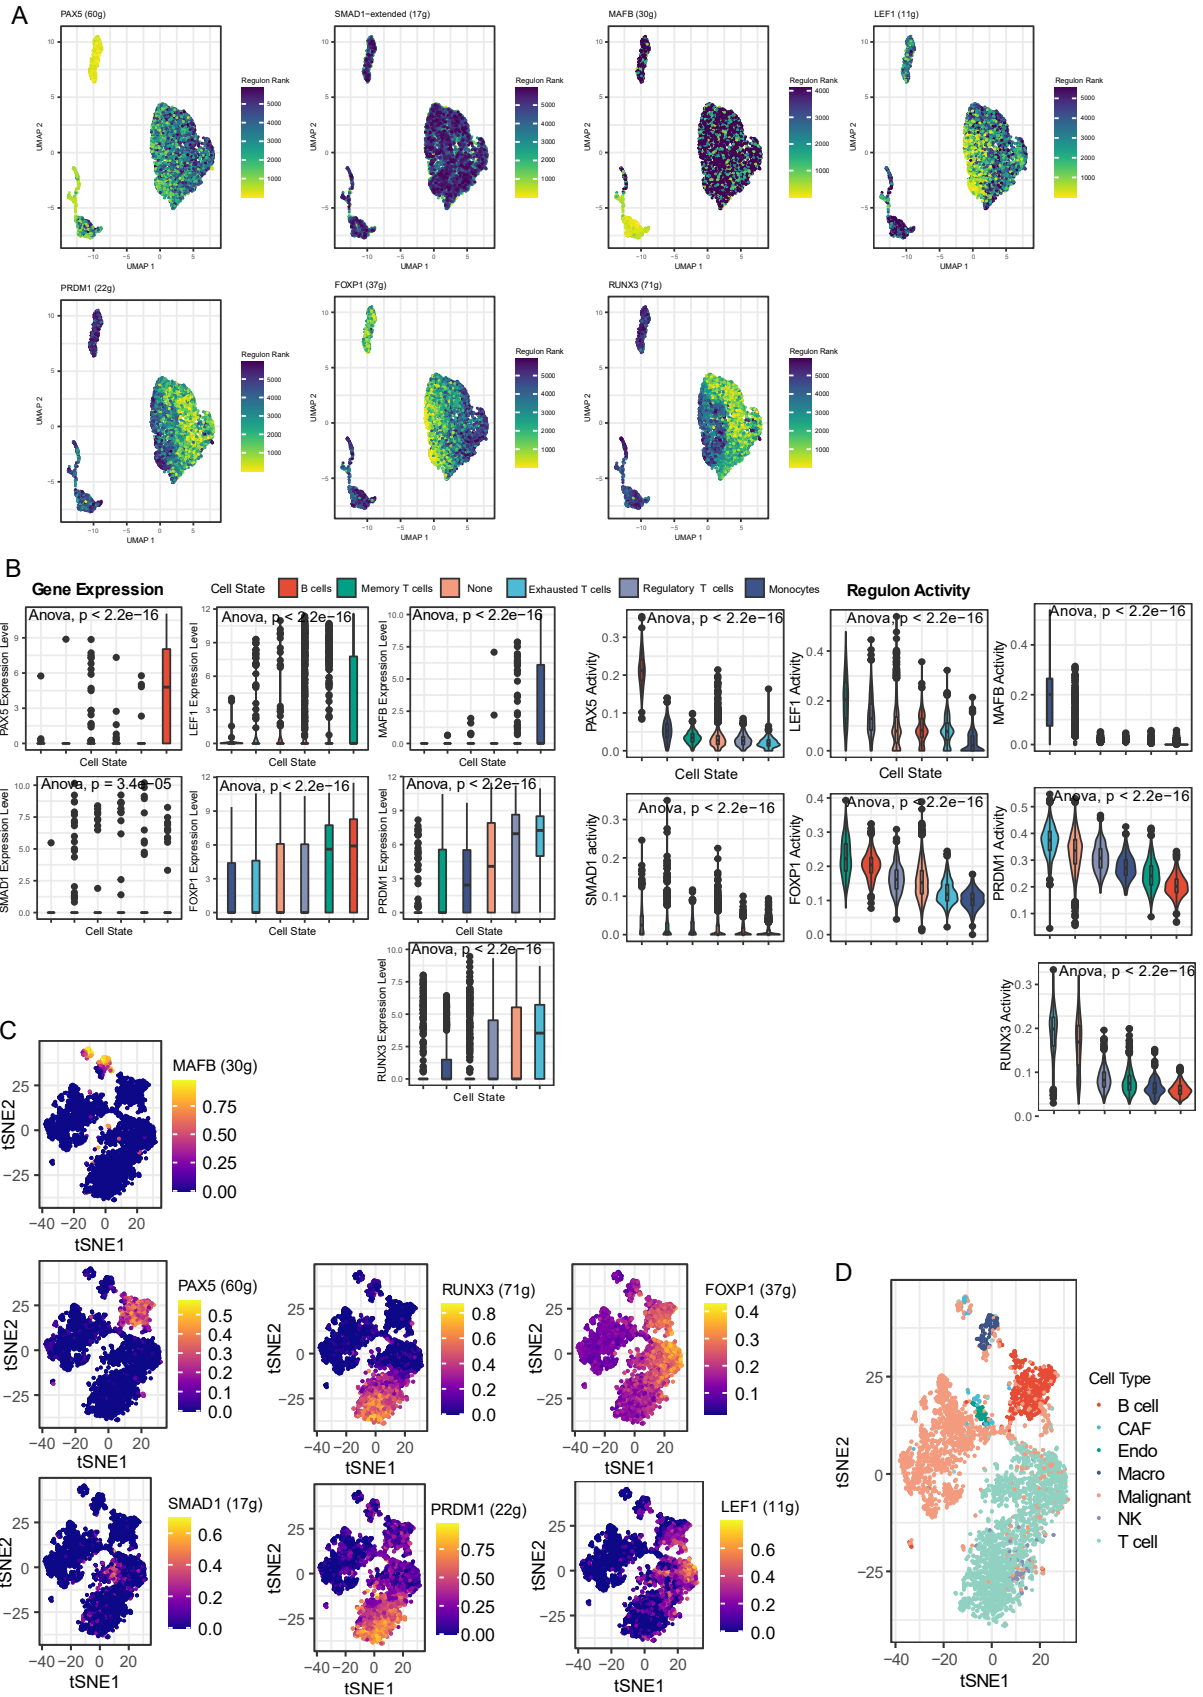

**Supplementary Figure S1. Regulon activity and upstream TF expression in the tumor microenvironment.**

**A)** UMAP embeddings of pre-treatment cells, colored using a quantitative scale of the relative rank of each regulon across the population of cells.

**B)** Left panel: the expression levels (log TPM) of the representative TF for each regulon in the DAseq-identified cell states. Right panel: regulon activity levels in each DAseq-identified cell state.

**C)** T-SNE plots of malignant and non-malignant cells, colored according to the relative activity of the regulons across the population of cells. The associated annotations of the cells represented in the t-SNE plots.

**D)** The associated annotations of the cells represented in the t-SNE plots.

## Supplementary Figure 2

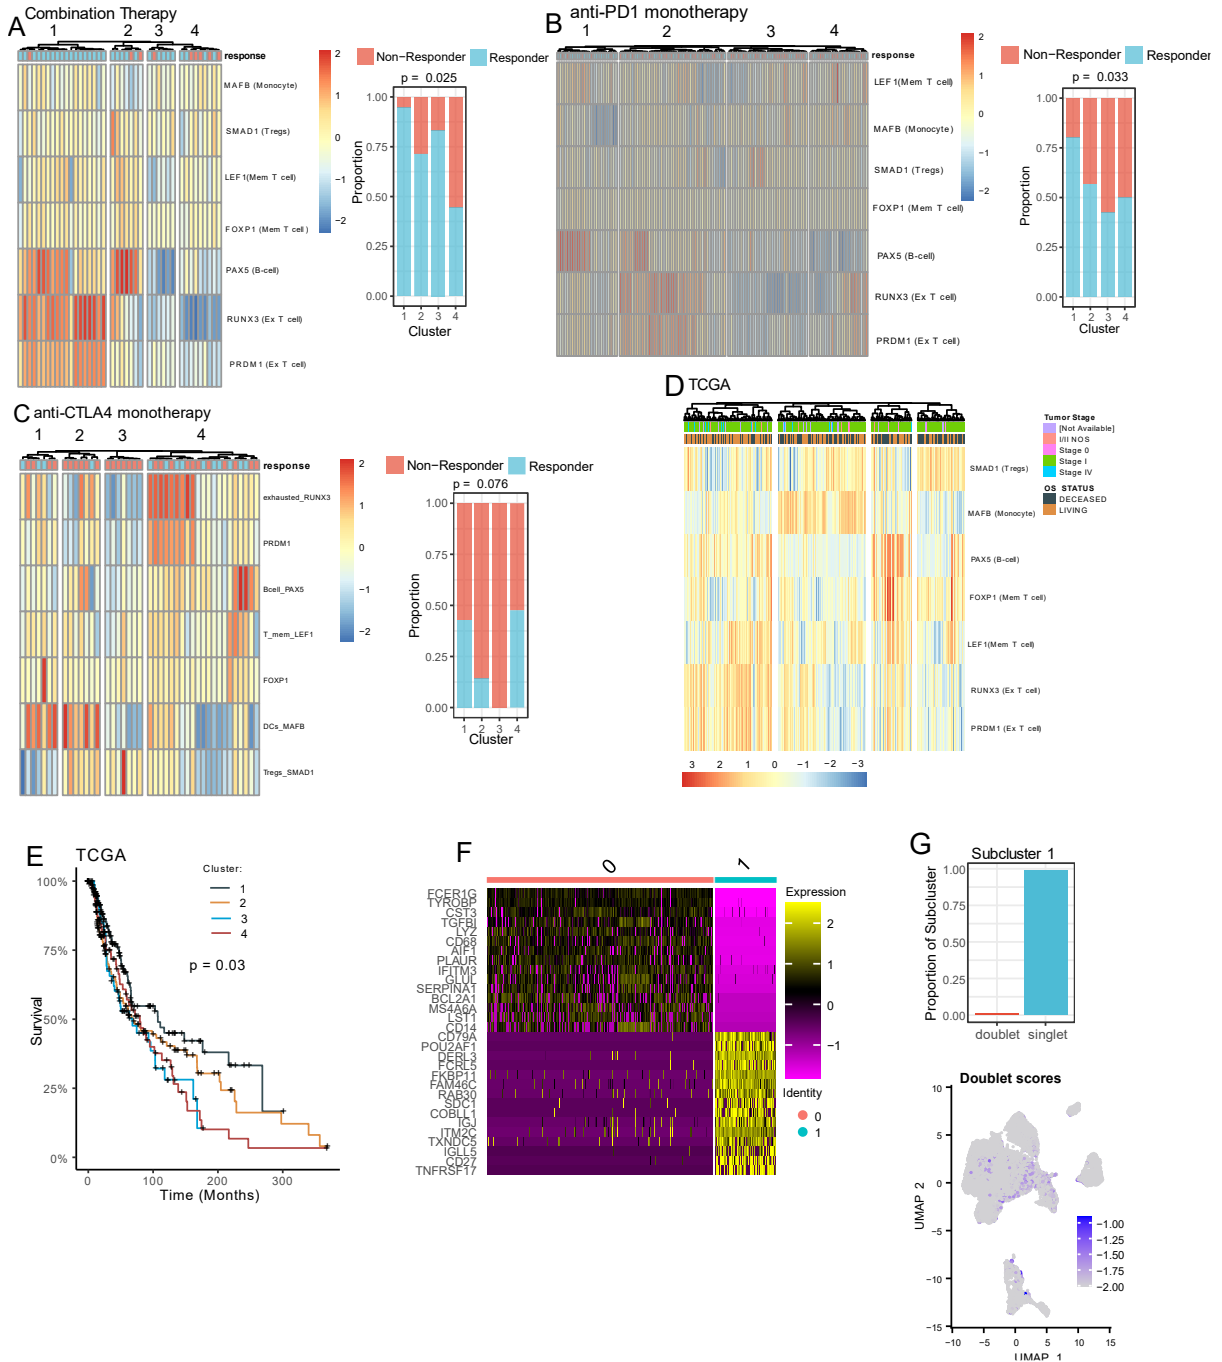

## Supplementary Figure S2. The predictive and prognostic value of regulons.

**A, B, C)** Left panels: Hierarchical clustering of patients from the bulk RNA-seq validation dataset according to their ssGSEA inferred regulon scores, which are represented by the color scale bar. Pearson correlation was used as the distance metric. Right Panels: The proportion

of responders and non-responders in each cluster. The p-value was calculated with a chi-squared test. Patients were stratified by treatment received (denoted in figure).

**D)** Hierarchical clustering of patients from TCGA according to their ssGSEA inferred regulon scores.

**E)** Kaplan Meier survival curves for each cluster identified from TCGA dataset, compared using a log rank test.

**F)** Heatmap displaying scaled expression values of DEGs per MLC subcluster.

**G)** Top panel: The proportion of doublets and singlets in subcluster 1 from the MLC state. Bottom panel: UMAP embedding of pre- and post-treatment cells from the discovery melanoma dataset ( $n = 16,291$ ). The cells are colored according to their doublet prediction scores from the Chord algorithm. A high score (purple) denotes a doublet and a low score (grey) denotes a singlet.
